# Supplementary figures and images for: Response-based outcome predictions and confidence regulate feedback processing and learning
Source: eLife journal article supplement (doi:10.7554/elife.62825), 2021-04-30

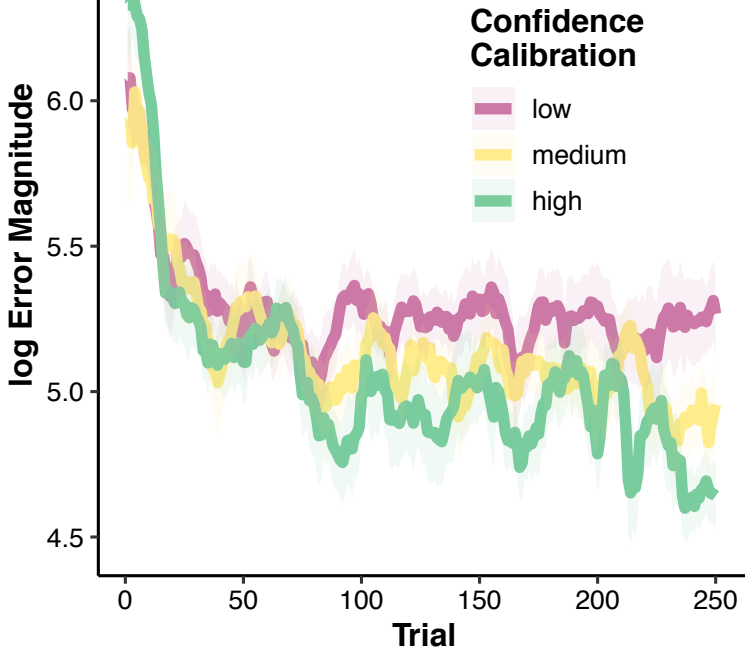

Supplement: supp [file elife-62825-supp-v1.zip]

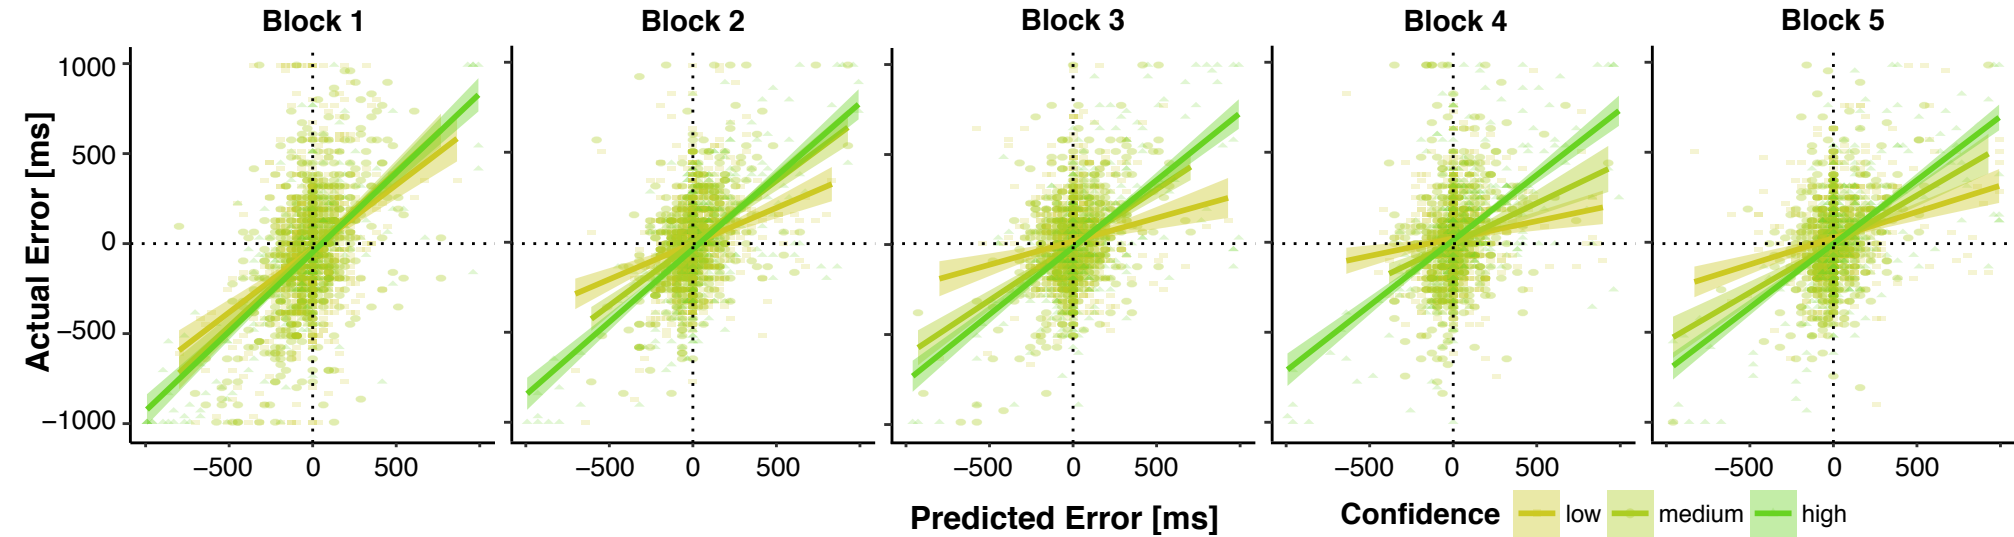

Supplement: supp [file elife-62825-supp-v1.zip]

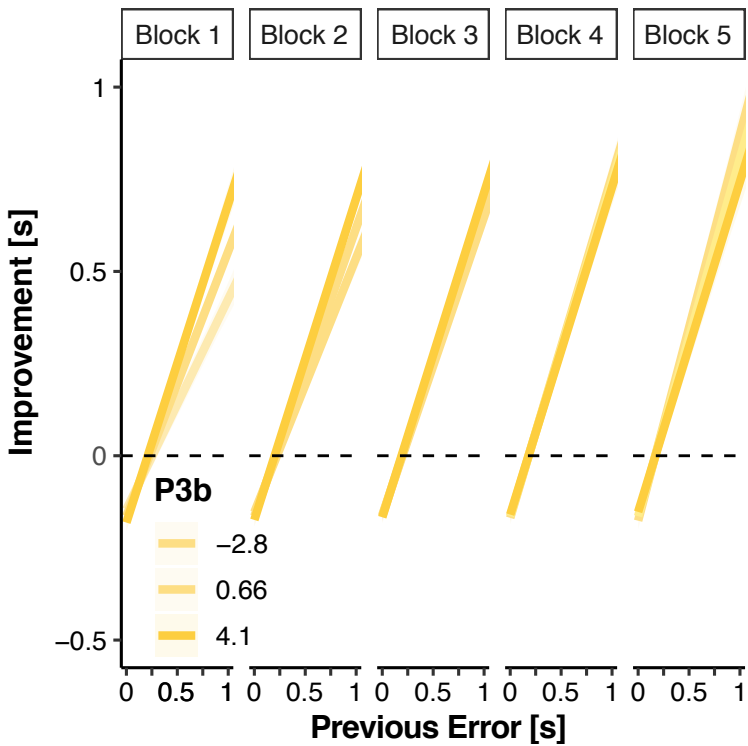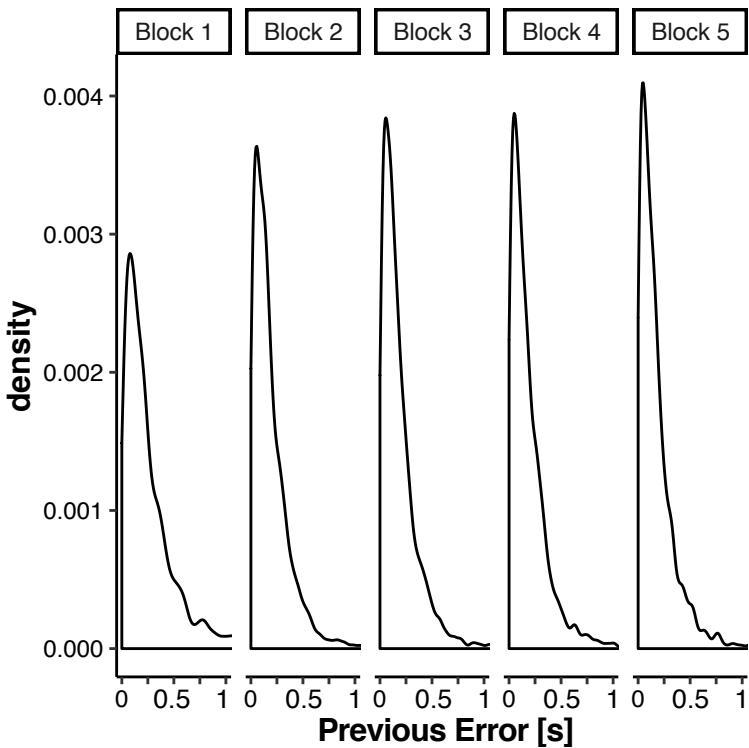

Supplement: supp [file elife-62825-supp-v1.zip]
